# Supplementary material for: Age-related changes in dermal collagen physical properties in human skin
Source: PubMed Central journal article supplement (PMC10707495; doi:10.1371/journal.pone.0292791), 2023-12-08

Fig 3b original gel image

M  
X

CTRL  
X

hMMP-1  
X

hMMP-1  
X

CTRL

hMMP-1

CTRL  
X

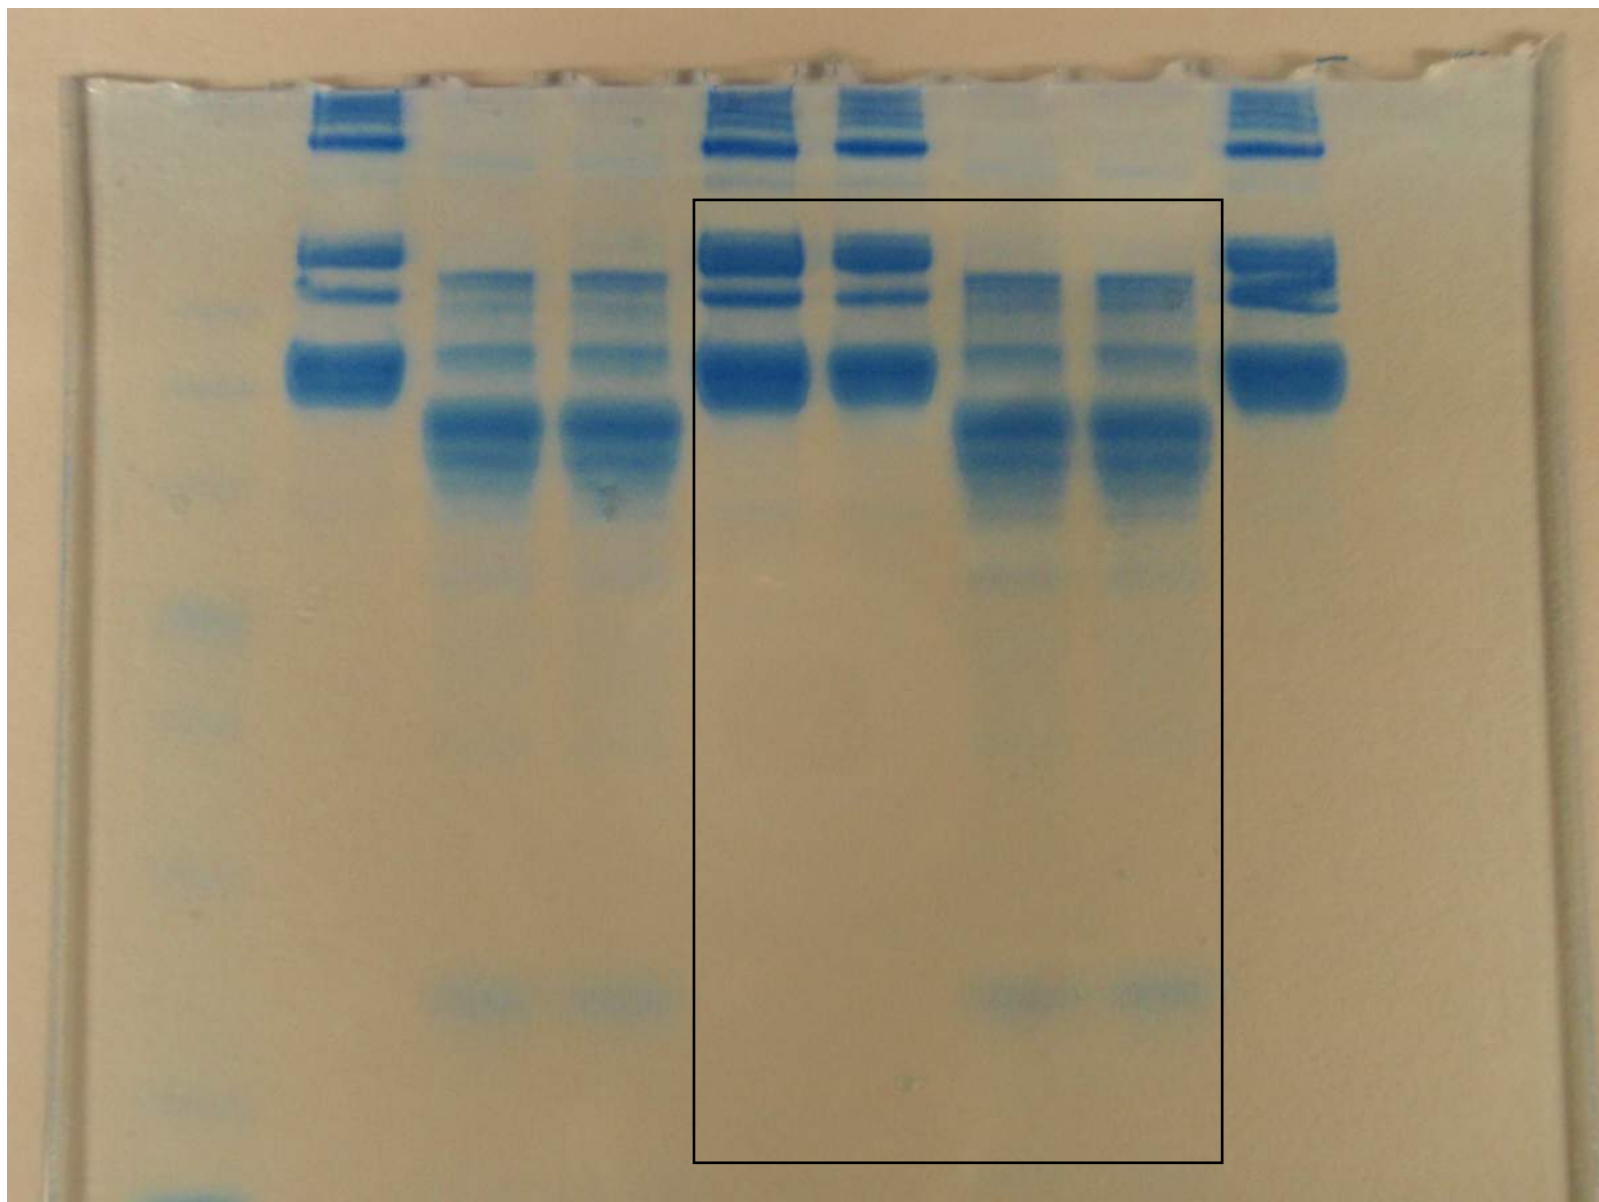

Supplement: pone.0292791.s001.pdf [file pone.0292791.s001.pdf]
